# Supplementary material for: A comprehensive survey of non-canonical splice sites in the human transcriptome
Source: PubMed Central journal article supplement (PMC4176328; doi:10.1093/nar/gku744), 2014-08-14

## SUPPLEMENTARY TABLE AND FIGURES LEGENDS

**Figure S1-9.** U2/U12-like Non-canonical splice junctions present at ETV1, IDH3B, ITPR1, NRK, C1orf63, POLR2E, RBFOX2 and TSPYL2 were validated by RT-PCR and Sanger sequencing. However, the U2/U12-like non-canonical splice junction present at CTNNB1 was not detected in the sequenced subclones. A) UCSC genome browser images show the identified non-canonical U2/U12-like splice junctions and the Sanger sequences that confirm their existence. B) RT-PCR of the non-canonical U2/U12-like splice junctions using 3 different RTs. The correspondence of RT-PCR products and expected isoforms are show to the right of each gel image, where § indicate that the isoform is not annotated in GENCODE v.17 and \* indicate that the presence of the isoform was corroborated by Sanger sequencing.

**Table S1.** The primers used for RT-PCRs of the U2/U12-like and non-U2/U12 non-canonical splice junctions.

**Table S2.** Odd ratios and Pearson Chi-square P-values calculated of the differences of IE densities between the different regions of U2/U12-like non-canonical and canonical splice sites.

**Table S3.** Odd ratios and Pearson Chi-square P-values calculated of the differences of IE densities between the different regions of U2/U12-like non-canonical and alternative canonical splice sites.

**Figure S10.** A picture of UCSC genome browser shows the detection of the non-U2/U12 splice junction of XBP1 gene. Red letters highlight the 6-nt direct repeat associated to this splice junction. As non-canonical splice sites present in GENCODE and in our annotation are located in direct repeats, the two alignments are equivalent.

**Figure S11-12.** Non-U2/U12 splice junctions present at PSENEN and NAPA were tried to validate through RT-PCR and Sanger sequencing. A) Pictures of UCSC genome browser show the non-U2/U12 splice sites and the alignment of the Sanger sequences. B) RT-PCR of the non-U2/U12 splice junctions using 2 different RTs. C) Secondary RNA structures associated to the non-U2/12 splice junctions. Direct repeats are highlighted in red and orange.

# Figure S1

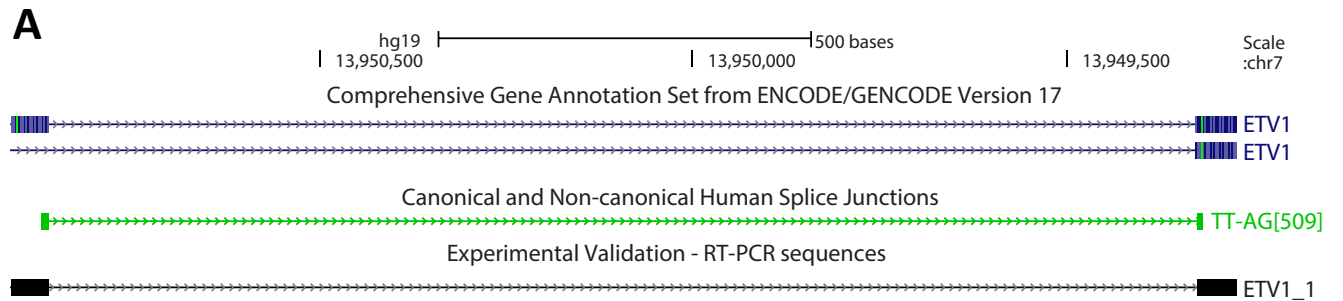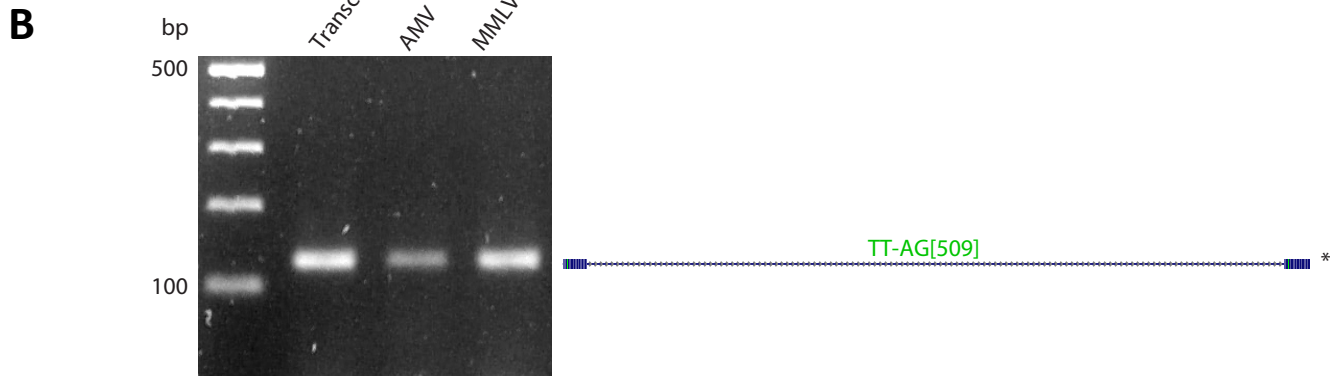

# Figure S2

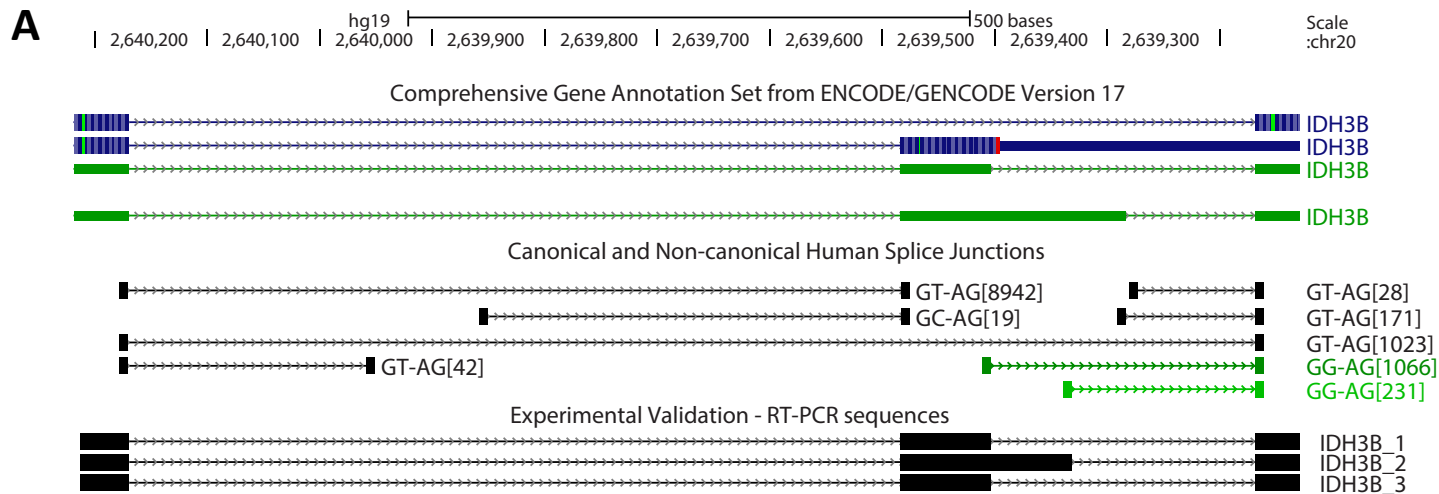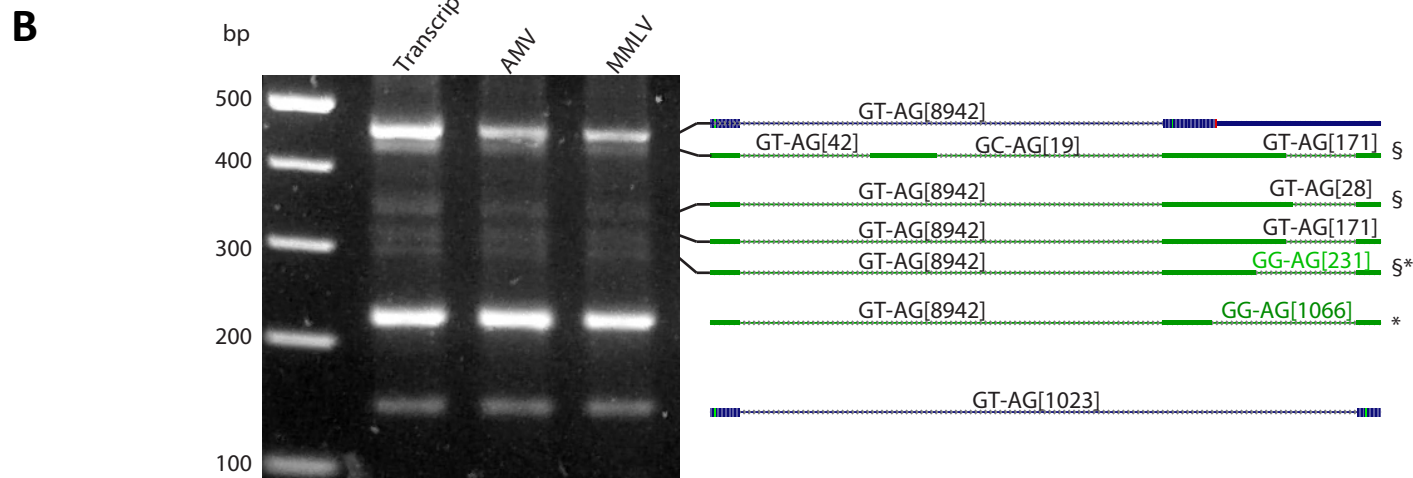

# Figure S3

**A**

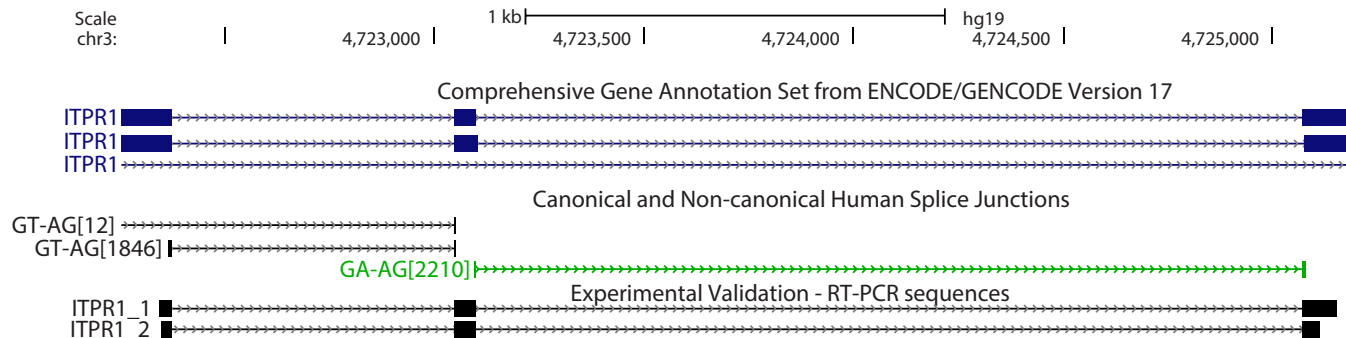

**B**

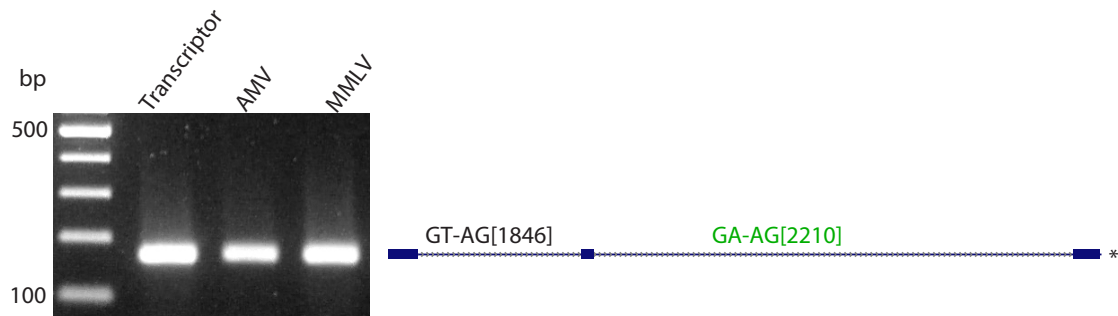

# Figure S4

**A**

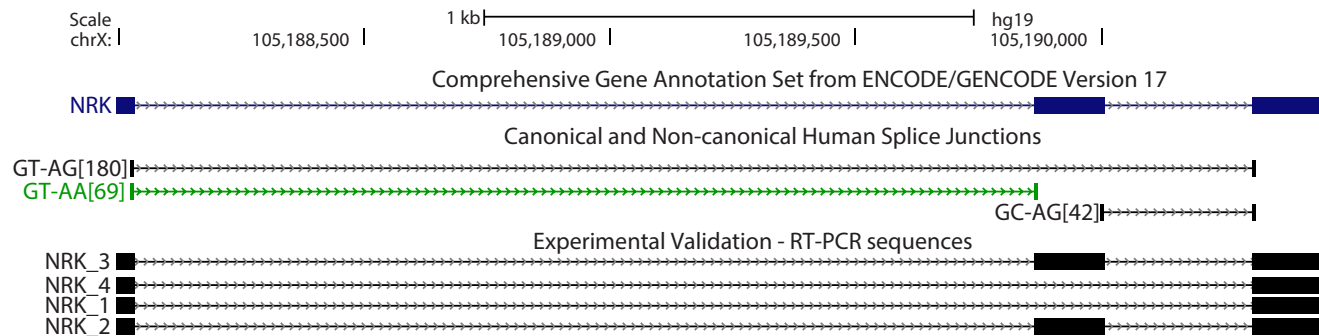

**B**

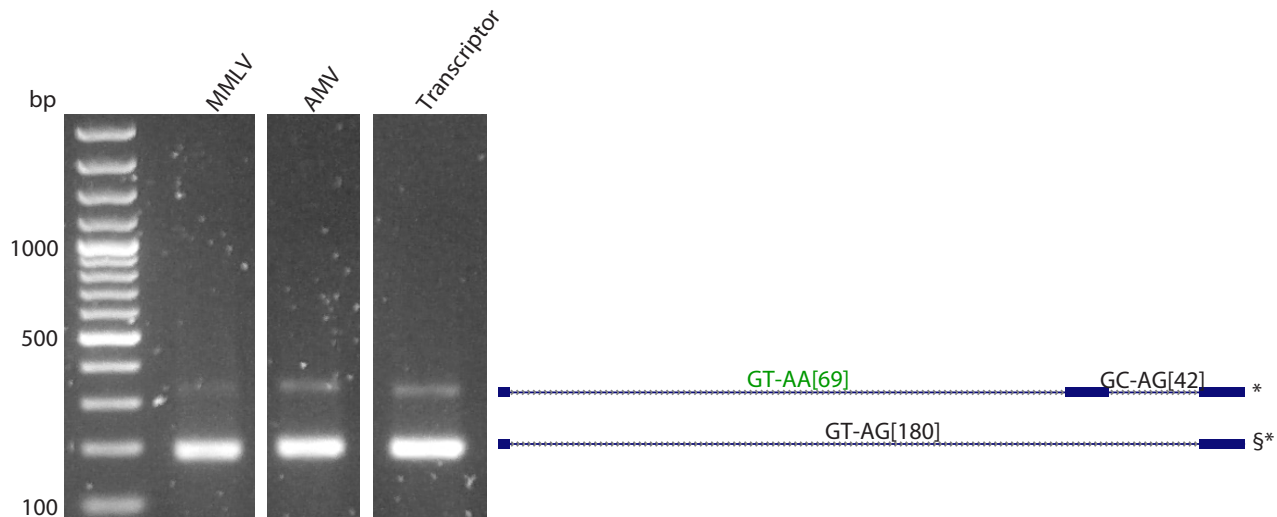

# Figure S5

**A**

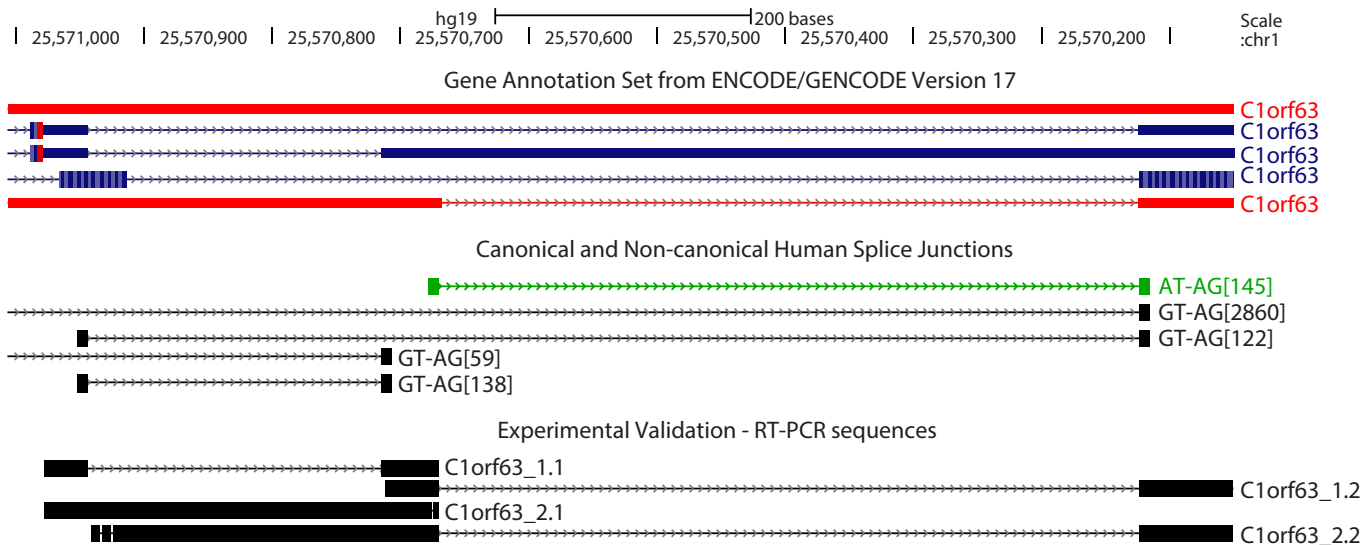

**B**

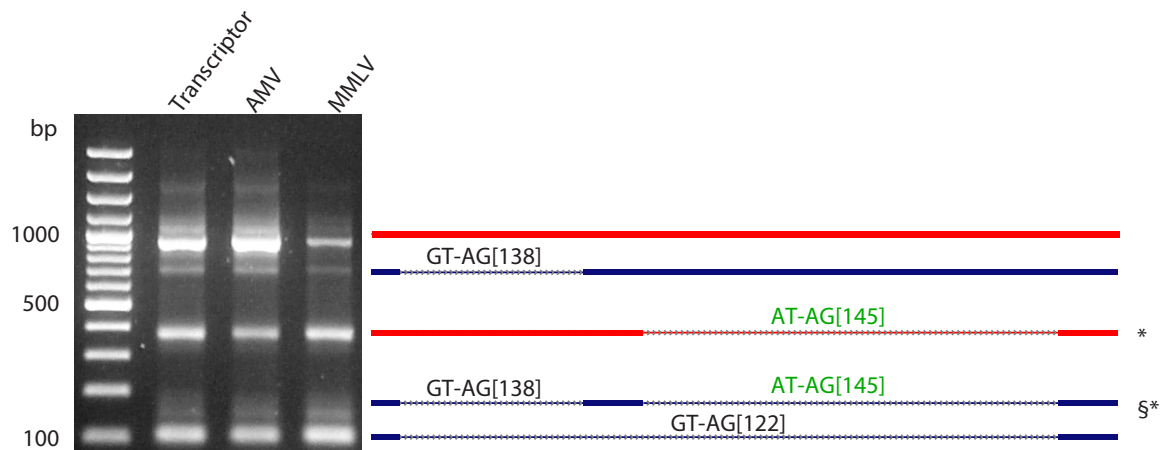

# Figure S6

**A**

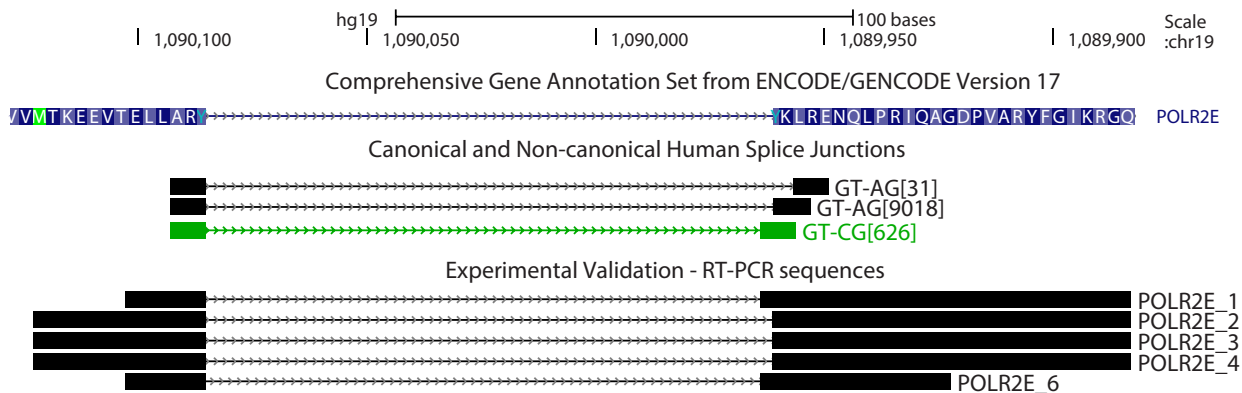

**B**

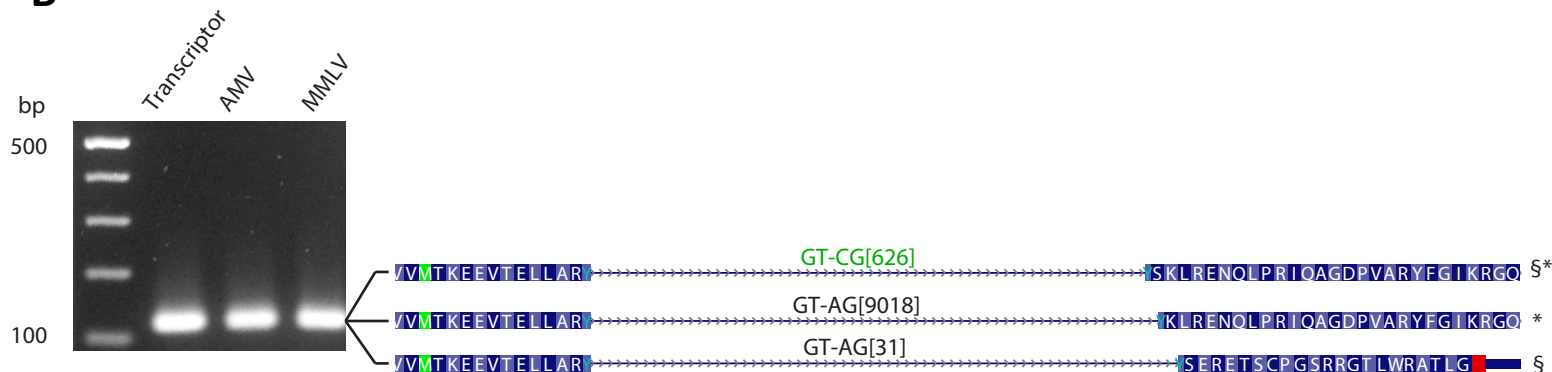

# Figure S7

**A**

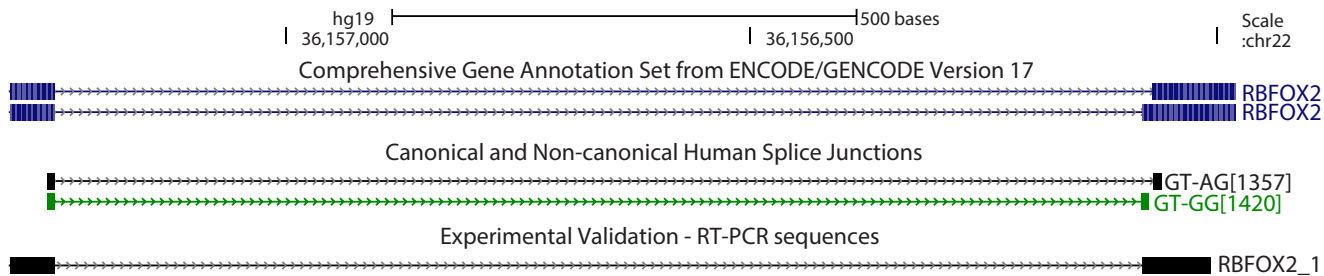

**B**

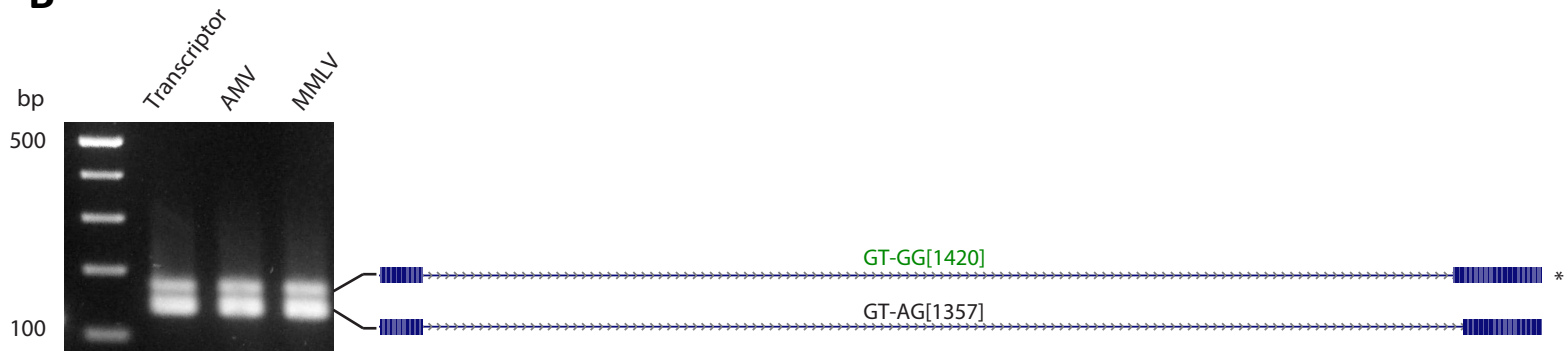



# Figure S8

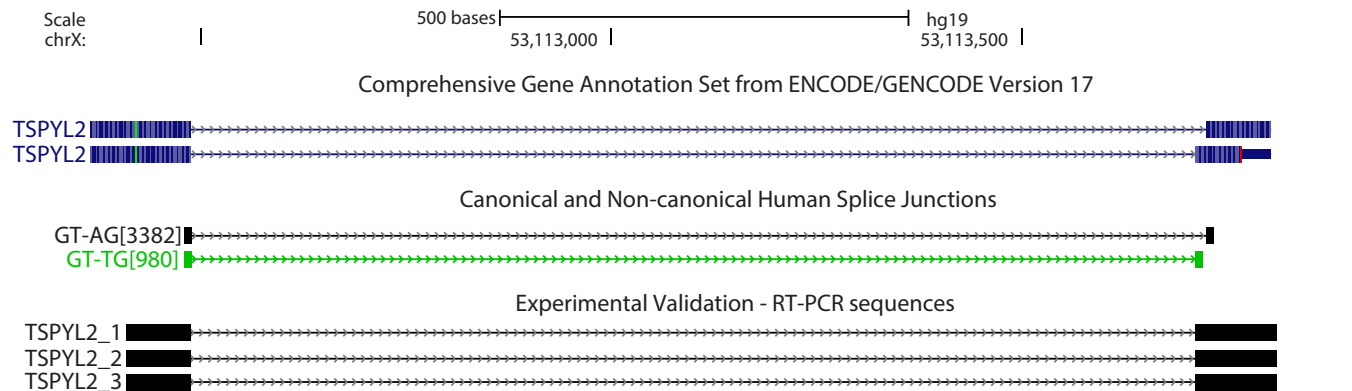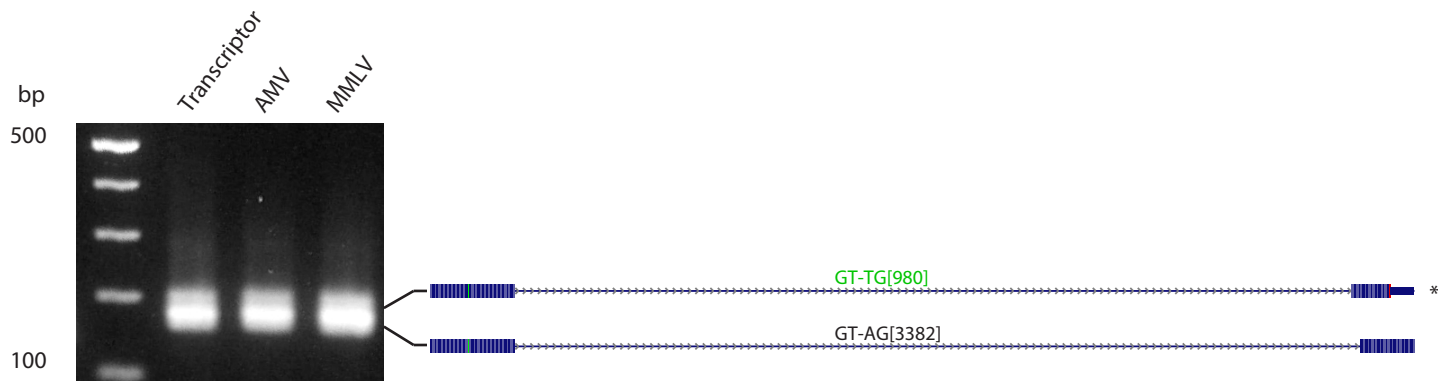

# Figure S9

Scale chr3: 41,280,800 | 41,280,900 | 200 bases | 41,281,000 | 41,281,100 | hg19 | 41,281,200 | 41,281,300 |

Comprehensive Gene Annotation Set from ENCODE/GENCODE Version 17

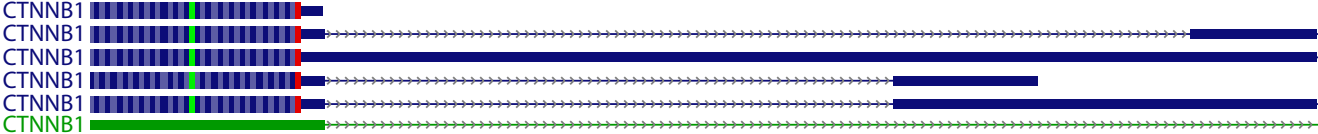

Canonical and Non-canonical Human Splice Junctions

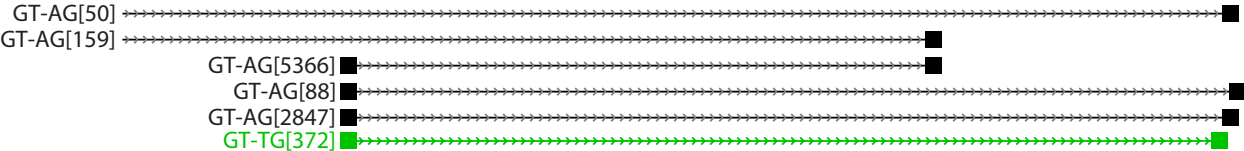

Experimental Validation - RT-PCR sequences

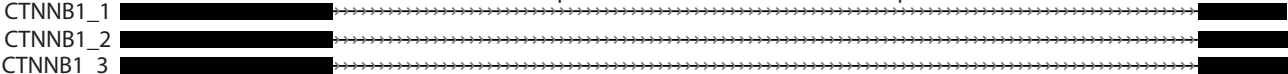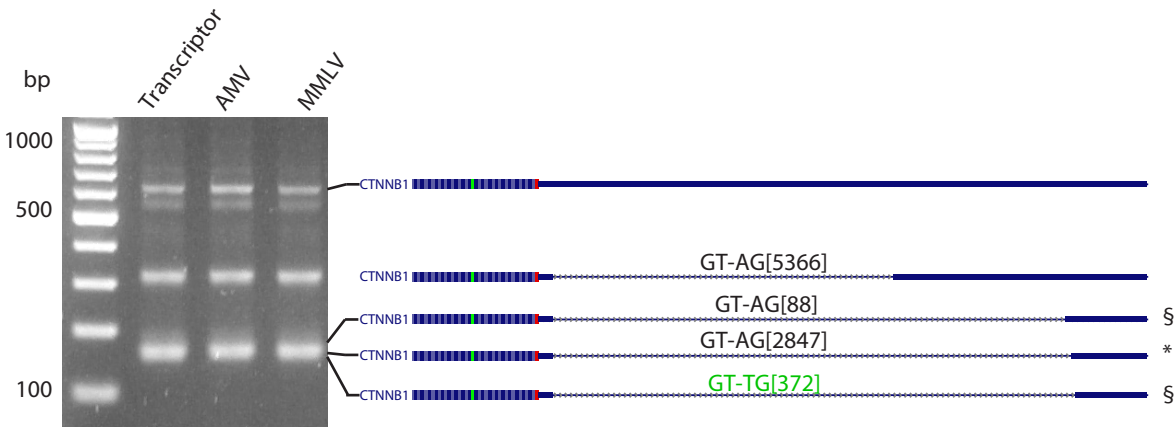

**Table S1**

| Gene    | Primers (5'→3')                                       |
|---------|-------------------------------------------------------|
| ETVI    | AGTGCCTAGCTGCCACTCCATTTA<br>CTGGGACAACACAGGTGTCATCAT  |
| IDH3B   | CATGATCGCAGATGCGGTGAAGAA<br>TTACATGGGTATGGACAGGGCCTA  |
| ITPR1   | CAGCCAAGAAGGGCCAAGTAATGT<br>AGTCATGCATCGTCAAGTGGAGCA  |
| NKR     | CTTTATGCATGGGCACCAAAGTCC<br>TCTTTGGCAGGGTCACATCAGACA  |
| C1orf63 | GTGGTCTGCAGACATTGATGAAGAA<br>AGCTATGCTTCTTTGCTGGGTAGG |
| POLR2E  | ATGACCAAGGAGGAGGTGACAGAG<br>TGCCACGCTTTATCCCAAAGTAG   |
| RBFOX2  | ATGTGTCCCTAGGCAATGATGCAG<br>TCAAATGGGCTCCTCTGAAAGCG   |
| CTNNB1  | ATATTCCTCGTTAGGGCAGGCG<br>GTCAGTTGCCAATGGGACATTCT     |
| CCNG1   | ATATTCCTCGTTAGGGCAGGCG<br>GTCAGTTGCCAATGGGACATTCT     |
| PSENE1  | GGGTTTGCTTTCCTGCCTTT<br>ATGTCAGCAGAGAACGTGGGACAT      |
| NAPA    | ATCAAGAAGACCATCCAGGGCGAT<br>AAGCATTAGGAAGGAGCAGGTGT   |

**Table S2**

| U2/U12-like splice sites | Region           | Identity elements | Odd ratio | P-value Pearson chi-square |            |
|--------------------------|------------------|-------------------|-----------|----------------------------|------------|
| 5' non-canonical         | 5' exon          | IIE               | 1.3855    | 3.4466E-09                 |            |
|                          |                  | EIE               | 1.1474    | 1.2380E-05                 |            |
|                          | 5' intron        | IIE               | 1.1375    | 1.6969E-03                 |            |
|                          |                  | EIE               | 1.1493    | 1.4575E-04                 |            |
|                          | 3' intron        | IIE               | 1.0039    | 9.3516E-01                 |            |
|                          |                  | EIE               | 1.1166    | 3.5408E-03                 |            |
|                          | 3' exon          | IIE               | 1.3856    | 3.4217E-09                 |            |
|                          |                  | EIE               | 1.1102    | 7.4518E-04                 |            |
|                          | 3' non-canonical | 5' exon           | IIE       | 0.9406                     | 2.4444E-01 |
|                          |                  |                   | EIE       | 1.1047                     | 9.7384E-05 |
| 5' intron                |                  | IIE               | 1.1069    | 1.5311E-03                 |            |
|                          |                  | EIE               | 1.0146    | 6.2872E-01                 |            |
| 3' intron                |                  | IIE               | 1.1167    | 1.8233E-03                 |            |
|                          |                  | EIE               | 1.1833    | 3.1760E-09                 |            |
| 3' exon                  |                  | IIE               | 0.9406    | 2.4495E-01                 |            |
|                          |                  | EIE               | 1.1191    | 5.0888E-06                 |            |

**Table S3**

| <b>U2/U12-like<br/>splice sites</b> | <b>Region</b> | <b>Identity<br/>elements</b> | <b>Odd ratio</b> | <b>P-value Pearson<br/>chi-square</b> |
|-------------------------------------|---------------|------------------------------|------------------|---------------------------------------|
| 5' non-canonical                    | 5' exon       | IIE                          | 1.3187           | 6.5445E-07                            |
|                                     |               | EIE                          | 1.1781           | 2.0693E-07                            |
|                                     | 5' intron     | IIE                          | 1.1229           | 4.7619E-03                            |
|                                     |               | EIE                          | 1.1761           | 9.5263E-06                            |
|                                     | 3' intron     | IIE                          | 1.0014           | 9.9628E-01                            |
|                                     |               | EIE                          | 1.1148           | 4.3347E-03                            |
| 3' exon                             | IIE           | 1.3189                       | 6.4759E-07       |                                       |
|                                     | EIE           | 1.1400                       | 2.5601E-05       |                                       |
| 3' non-canonical                    | 5' exon       | IIE                          | 0.8952           | 3.7673E-02                            |
|                                     |               | EIE                          | 1.1342           | 8.8481E-07                            |
|                                     | 5' intron     | IIE                          | 1.0927           | 6.0074E-03                            |
|                                     |               | EIE                          | 1.0382           | 2.1624E-01                            |
|                                     | 3' intron     | IIE                          | 1.1139           | 2.4714E-03                            |
|                                     |               | EIE                          | 1.1814           | 4.9915E-09                            |
| 3' exon                             | IIE           | 0.8953                       | 3.7870E-02       |                                       |
|                                     | EIE           | 1.1491                       | 1.9077E-08       |                                       |

# Figure S10

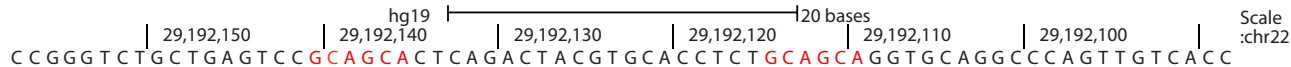

Gene Annotation from ENCODE/GENCODE Version 17

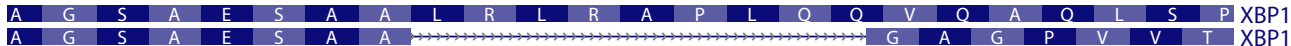

Canonical and Non-canonical Human Splice Junctions

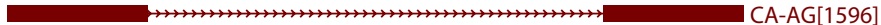

# Figure S11

**A**

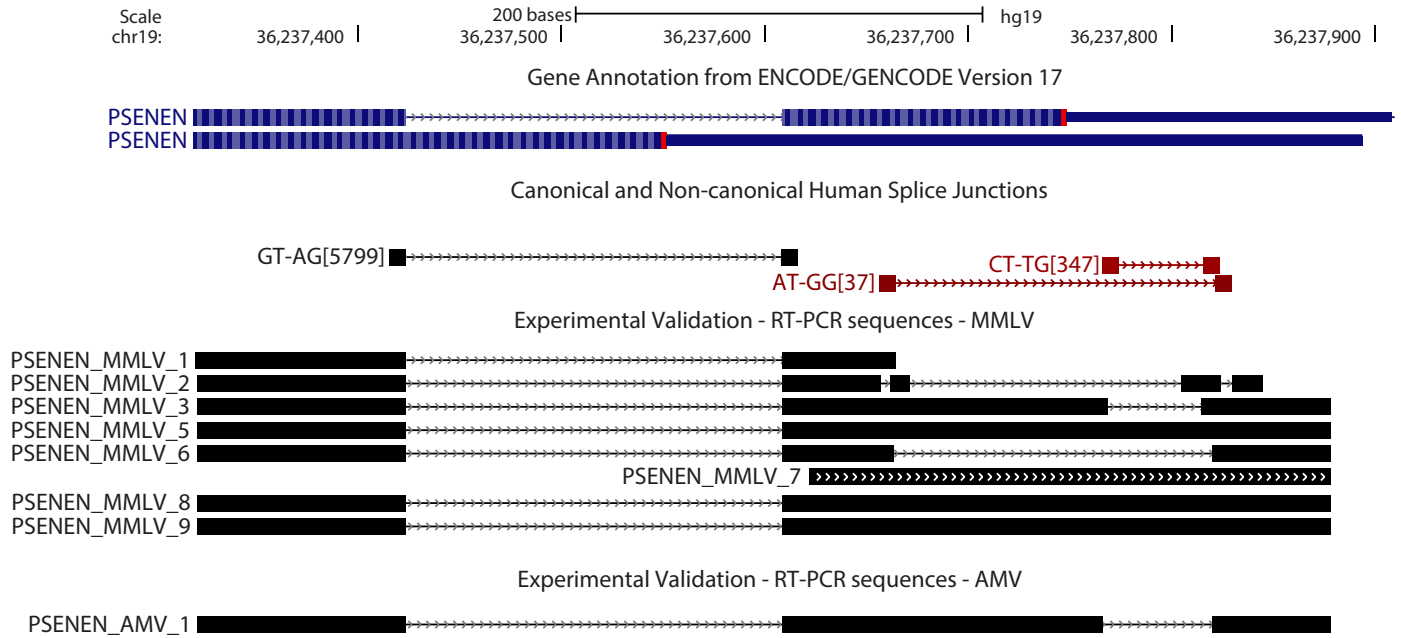

**B**

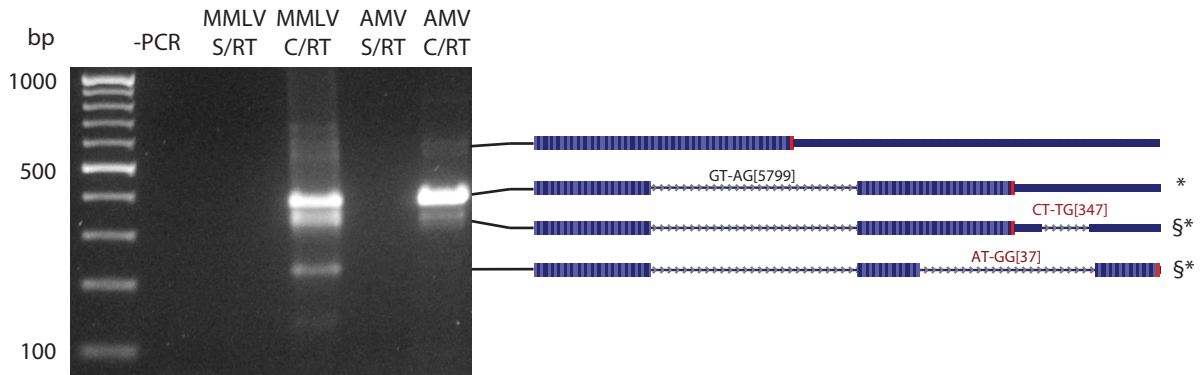

**C**

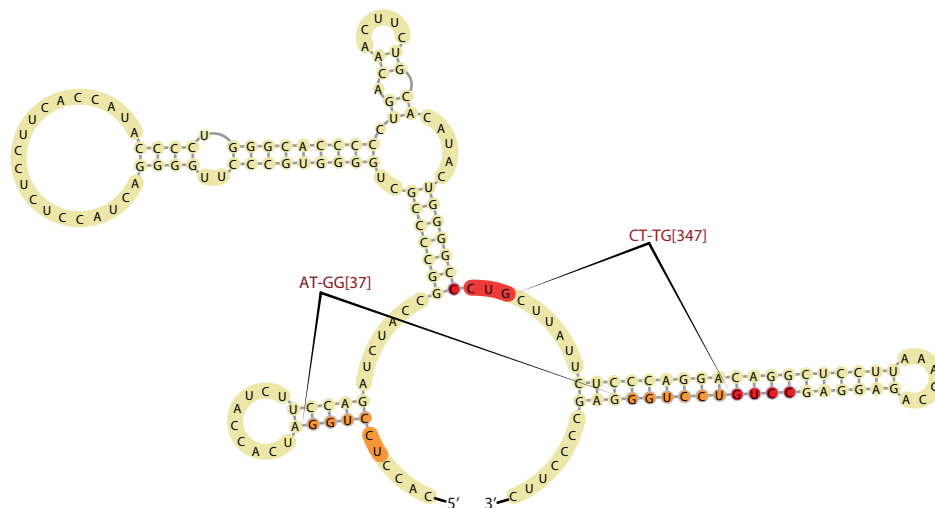

# Figure S12

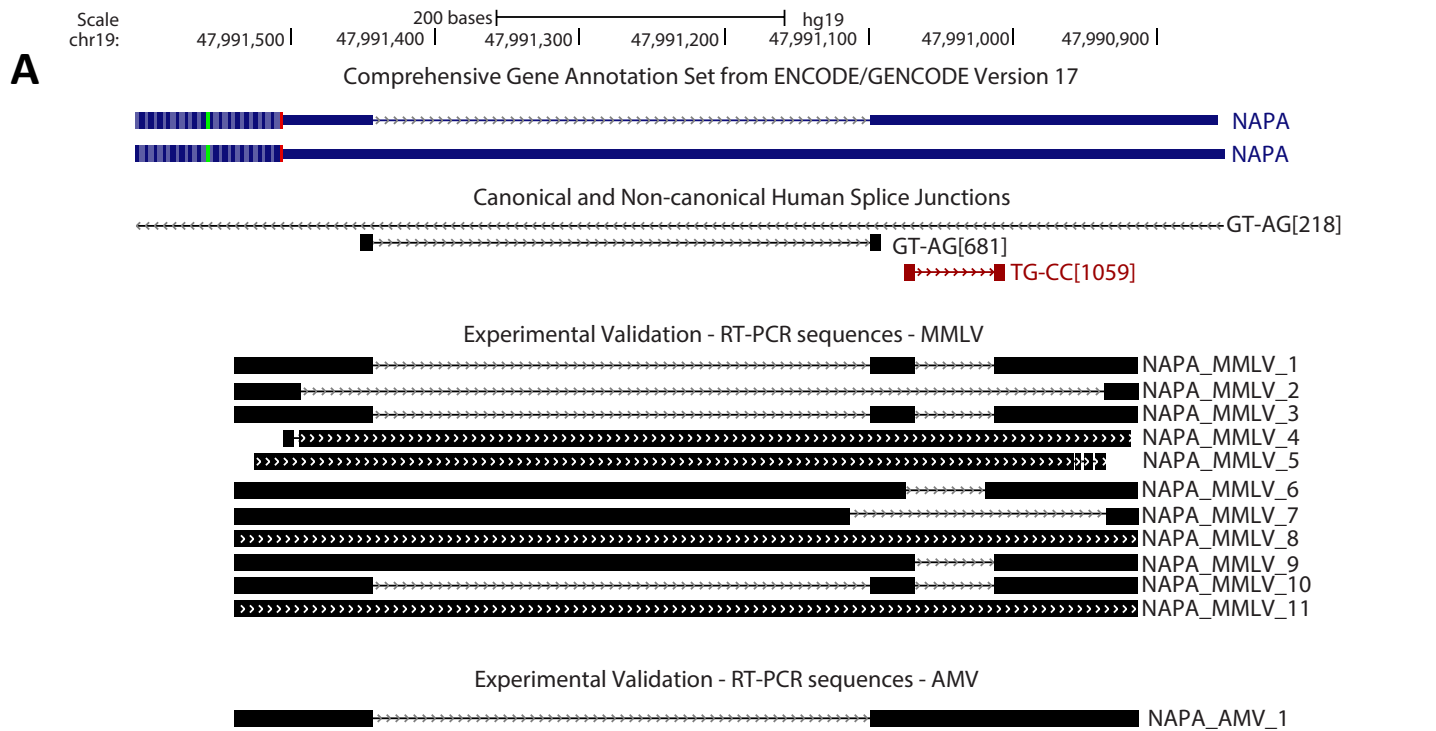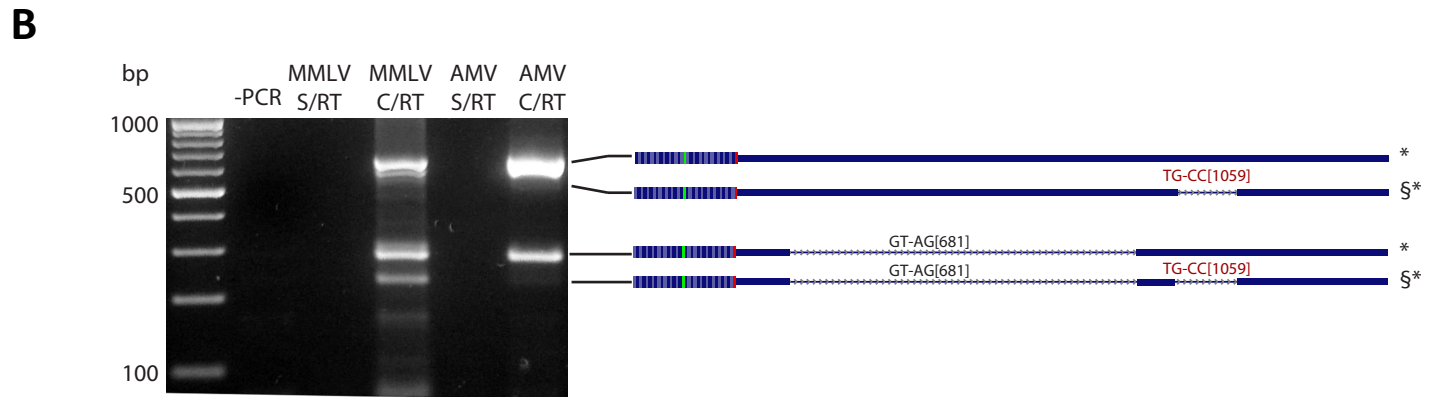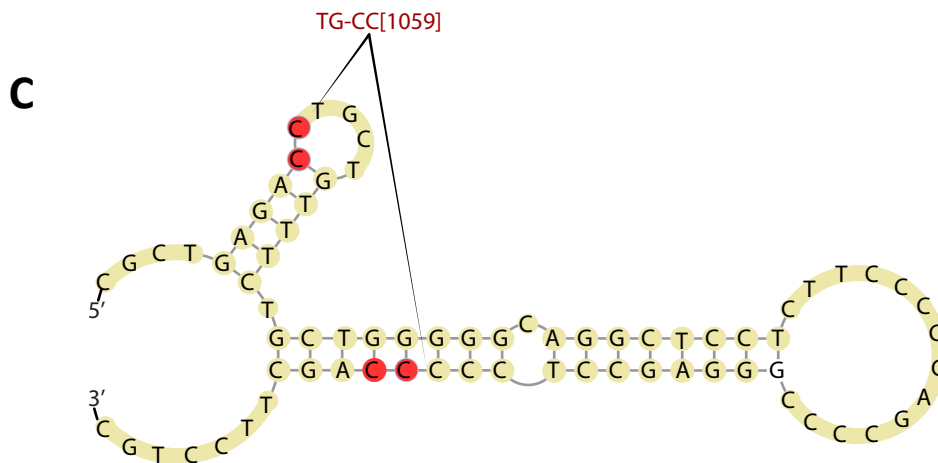

Supplement: supp_gku744_SUPPLEMENTARY_TABLE_AND_FIGURES_LEGENDS_2.pdf [file supp_gku744_SUPPLEMENTARY_TABLE_AND_FIGURES_LEGENDS_2.pdf]
